# Supplementary material
Source: PubMed Central journal article supplement (PMC5540763)
Supplement: NIHMS857869-supplement-2.pdf [file NIHMS857869-supplement-2.pdf]

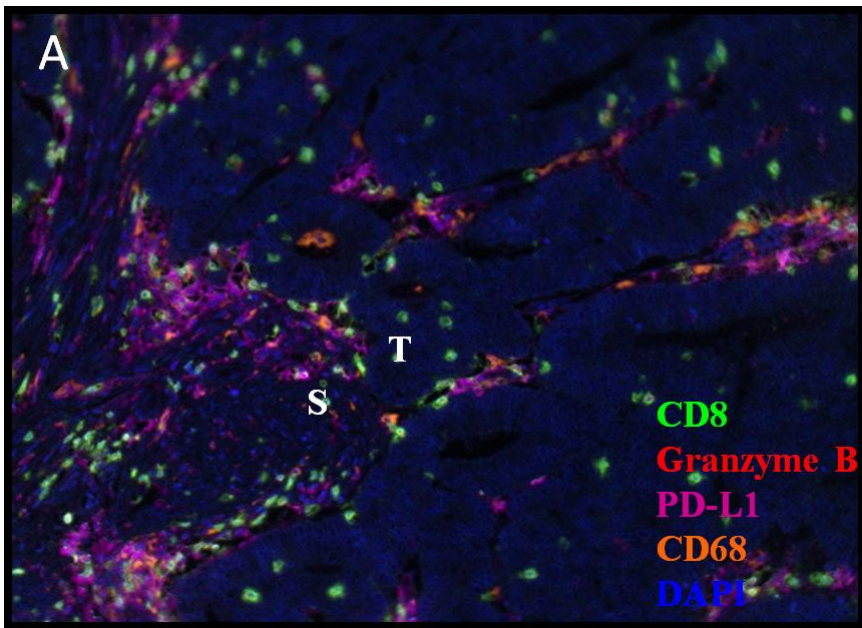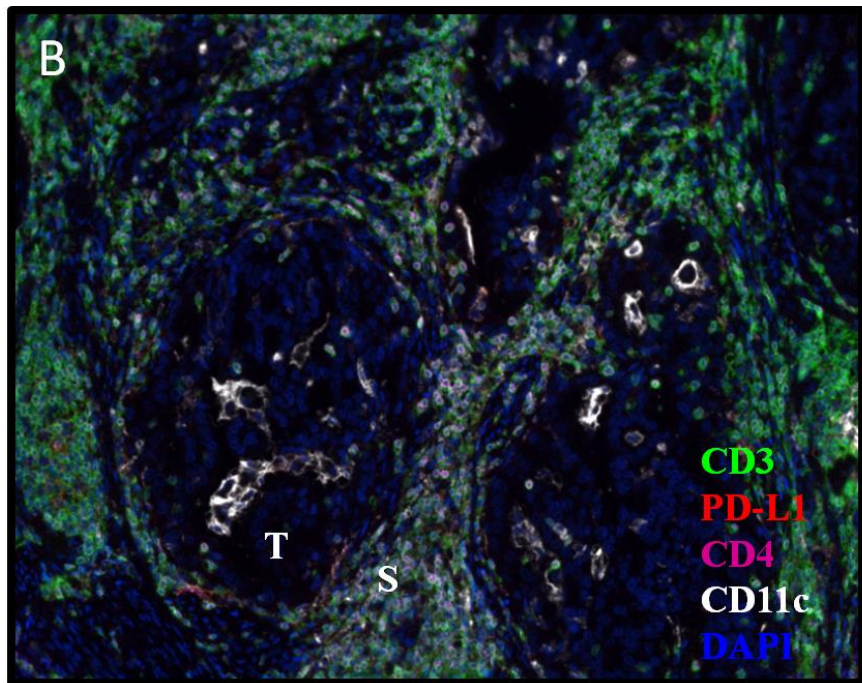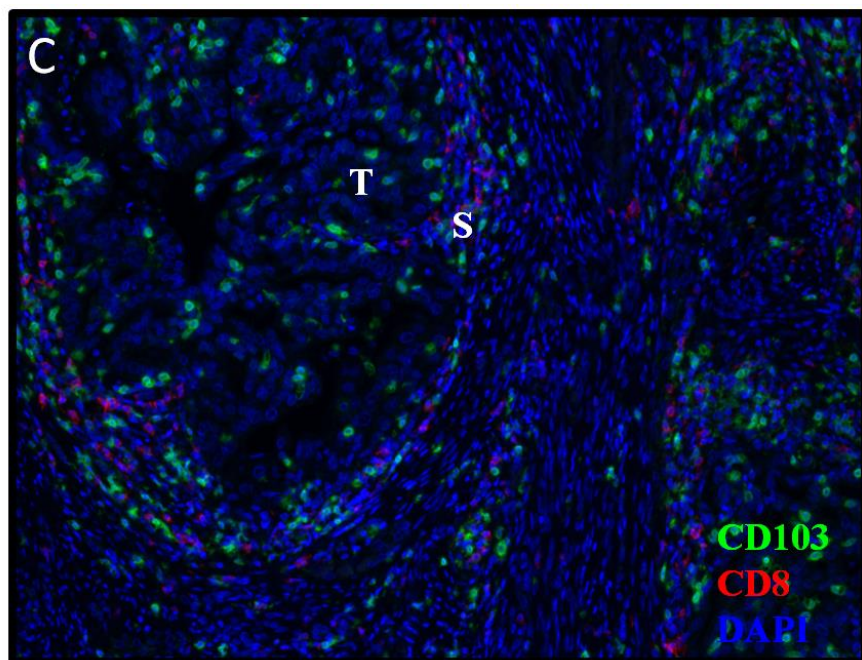

**Supplementary Figure S1. Fluorescent IHC multiplexing panel images.** (A) Example image of IHC multiplexing panel 1 including: CD8 (green), Granzyme B (red), CD68 (orange), PD-L1 (magenta), and DAPI (blue). (B) Example image of IHC multiplexing panel 2 including: CD3 (green), PD-L1 (red), CD4 (magenta), CD11c (white), and DAPI (blue). (C) Example image of IHC multiplexing panel 3 including: CD 103 (green), CD8 (red), and DAPI (blue). Magnification, 200x. S indicates peritumoral stroma; T indicates tumor epithelium.
